# Supplementary material for: Thirteen is enough: the myosins of Dictyostelium discoideum and their light chains
Source: Springer Nature journal article supplement (doi:10.1186/1471-2164-7-183), 2006-07-20

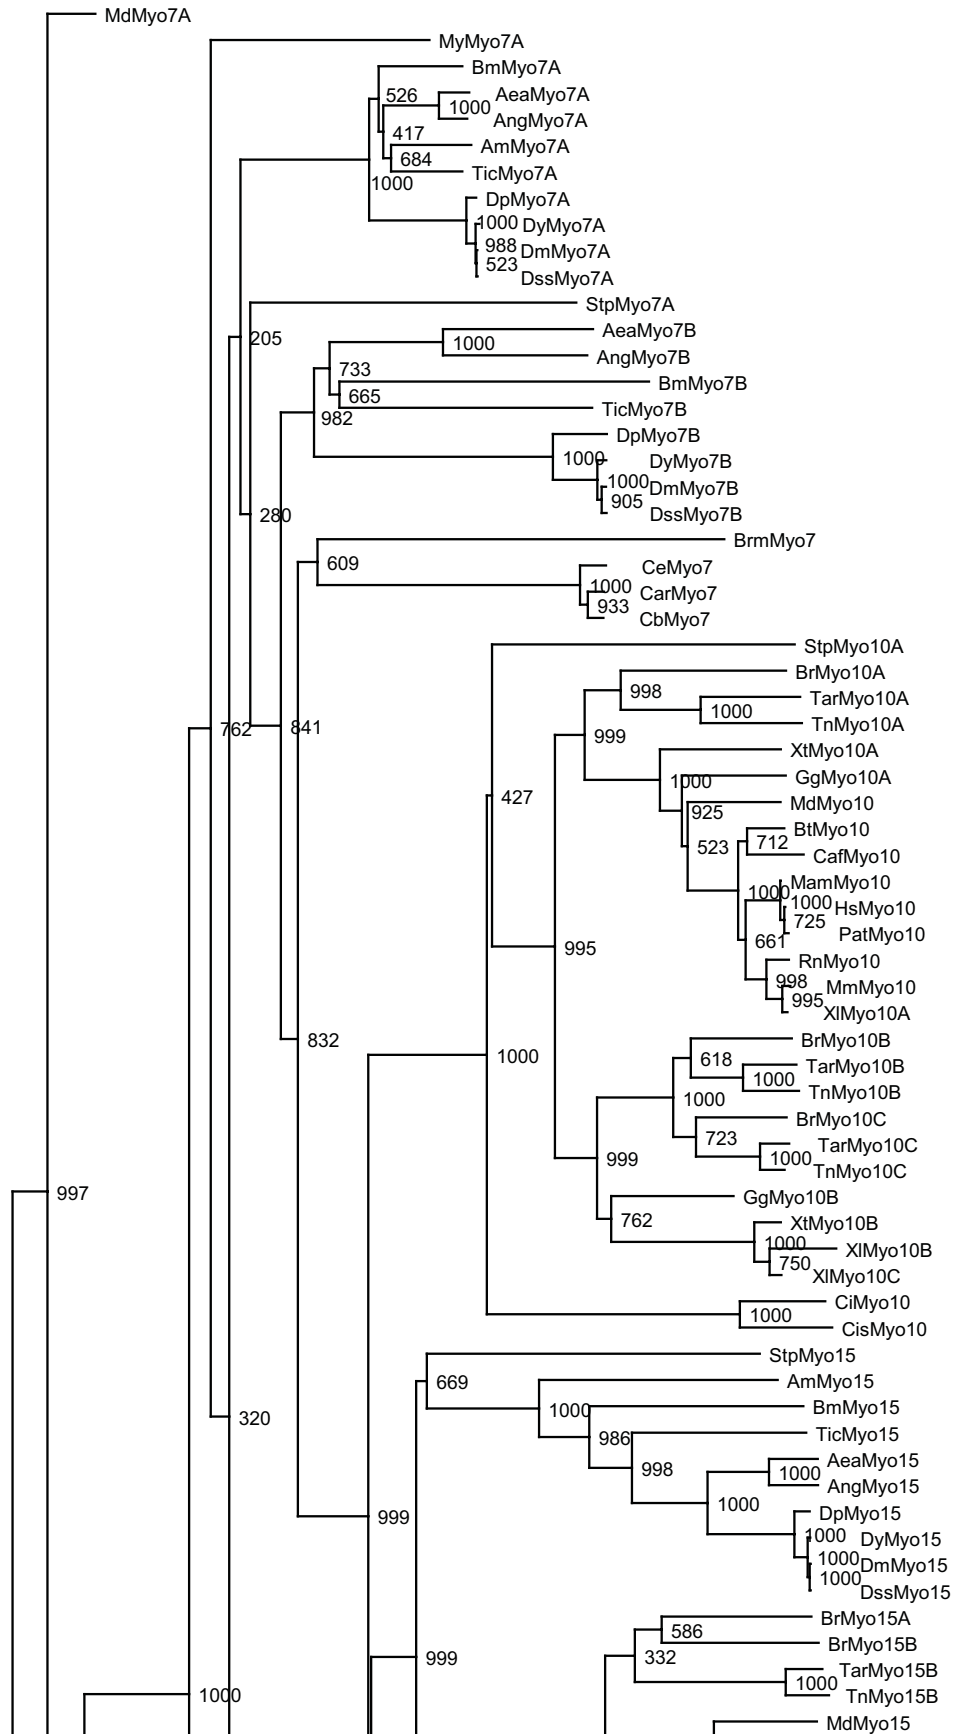

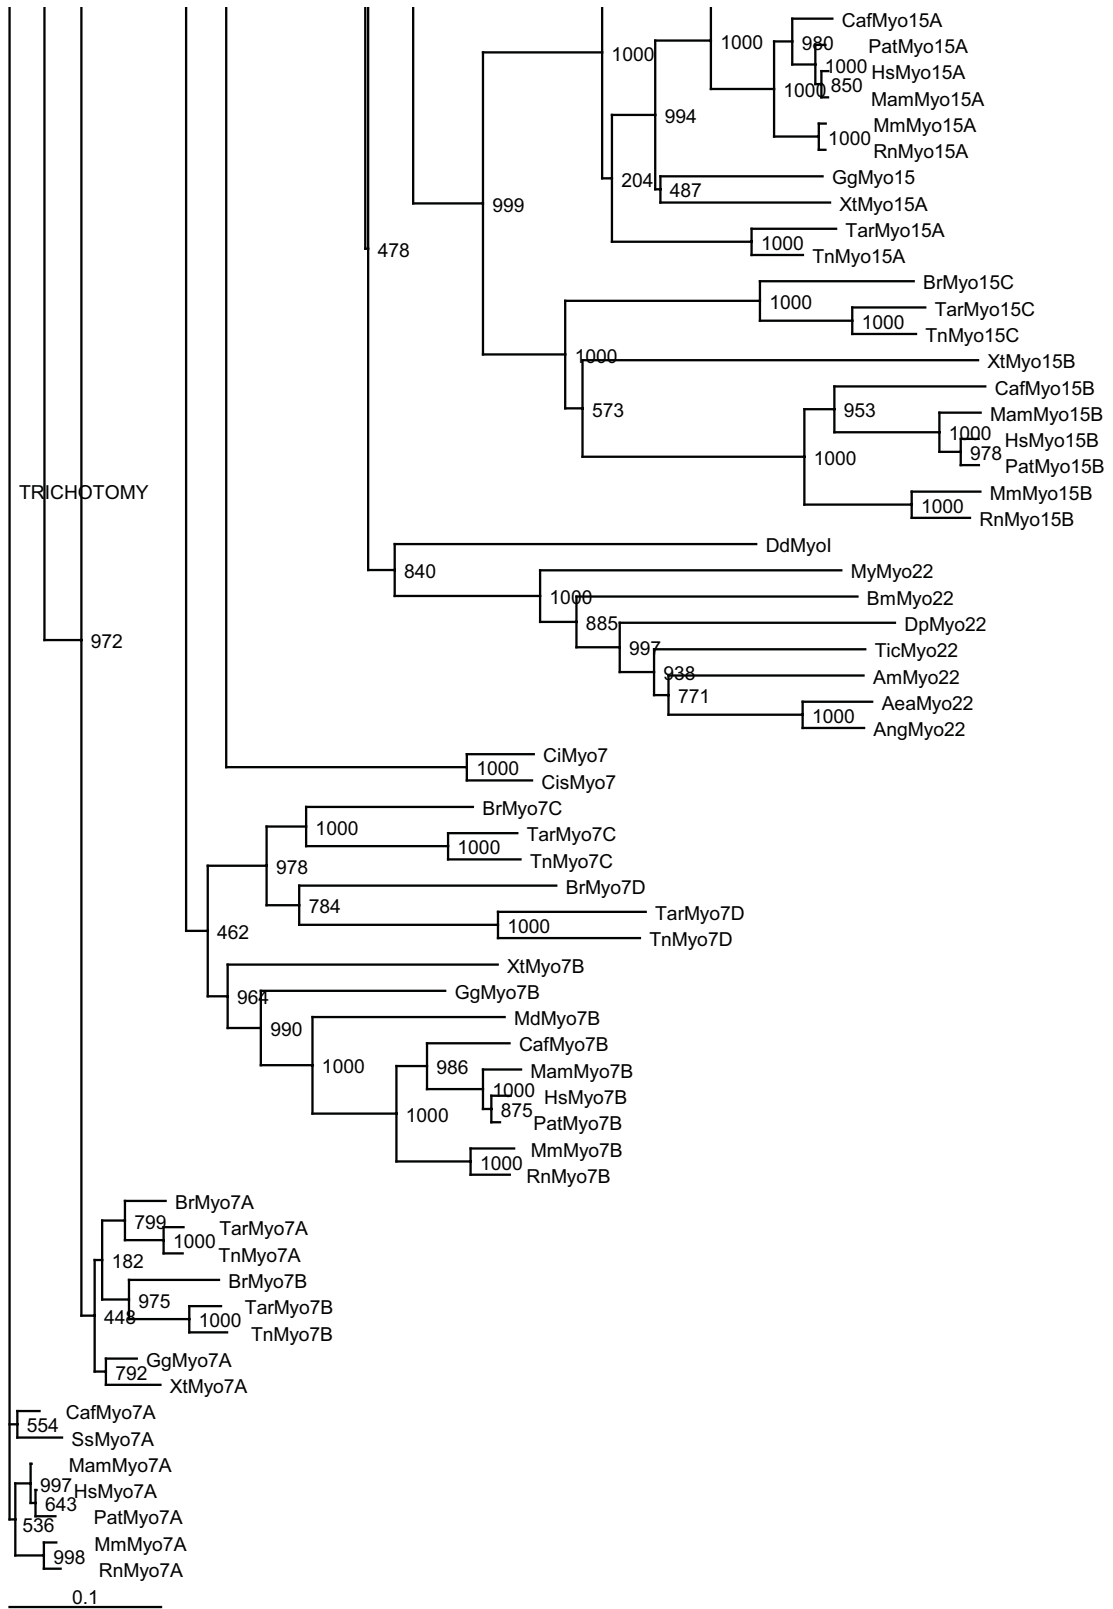

Supplement: Additional file 2 [file 1471-2164-7-183-s2.pdf]
